# Supplementary material
Source: HighWire-hosted journal article supplement (https://jnm.snmjournals.org/highwire/filestream/110356/field_highwire_adjunct_files/0/264424_Supplemental_Data.pdf)
Supplement: 264424_Supplemental_Data.pdf [file 264424_Supplemental_Data.pdf]

### Supplemental Figure 1. CONSORT Flow Diagram

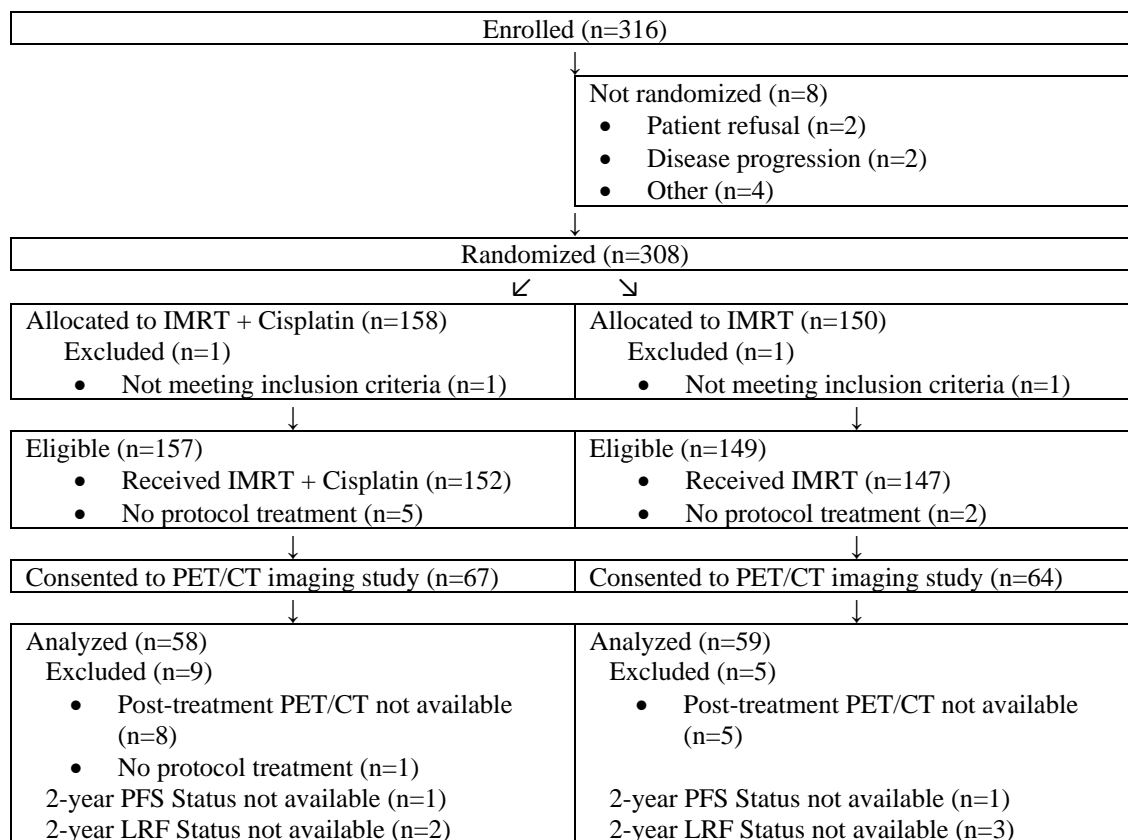

**Supplemental Table 1**  
**Patient and Tumor Characteristics by PET/CT Consent**

|             | Did Not Consent to PET/CT |      | Consented to PET/CT |      | Total |      | p-value    |
|-------------|---------------------------|------|---------------------|------|-------|------|------------|
|             | n                         | %    | n                   | %    | n     | %    |            |
| Age (years) |                           |      |                     |      |       |      |            |
| ≤ 49        | 23                        | 13.1 | 19                  | 14.5 | 42    | 13.7 | 0.2911 [1] |
| 50 - 59     | 74                        | 42.3 | 42                  | 32.1 | 116   | 37.9 |            |
| 60 - 69     | 54                        | 30.9 | 47                  | 35.9 | 101   | 33.0 |            |
| ≥ 70        | 24                        | 13.7 | 23                  | 17.6 | 47    | 15.4 |            |
| Gender      |                           |      |                     |      |       |      |            |
| Male        | 142                       | 81.1 | 115                 | 87.8 | 257   | 84.0 | 0.1558 [2] |
| Female      | 33                        | 18.9 | 16                  | 12.2 | 49    | 16.0 |            |
| Race        |                           |      |                     |      |       |      | 0.1772 [2] |

|                                  | Did Not Consent to PET/CT |      | Consented to PET/CT |      | Total |      | p-value    |
|----------------------------------|---------------------------|------|---------------------|------|-------|------|------------|
|                                  | n                         | %    | n                   | %    | n     | %    |            |
| American Indian/Alaska Native    | 1                         | 0.6  | 1                   | 0.8  | 2     | 0.7  |            |
| Asian                            | 4                         | 2.3  | 0                   | 0.0  | 4     | 1.3  |            |
| Black or African American        | 2                         | 1.1  | 1                   | 0.8  | 3     | 1.0  |            |
| White                            | 162                       | 92.6 | 119                 | 90.8 | 281   | 91.8 |            |
| Unknown or not reported          | 6                         | 3.4  | 10                  | 7.6  | 16    | 5.2  |            |
| Ethnicity                        |                           |      |                     |      |       |      | 0.7358 [2] |
| Hispanic or Latino               | 6                         | 3.4  | 4                   | 3.1  | 10    | 3.3  |            |
| Not Hispanic or Latino           | 154                       | 88.0 | 119                 | 90.8 | 273   | 89.2 |            |
| Unknown                          | 15                        | 8.6  | 8                   | 6.1  | 23    | 7.5  |            |
| Zubrod performance status        |                           |      |                     |      |       |      | 0.7743 [2] |
| 0                                | 139                       | 79.4 | 106                 | 80.9 | 245   | 80.1 |            |
| 1                                | 36                        | 20.6 | 25                  | 19.1 | 61    | 19.9 |            |
| Smoking history: pack-years      |                           |      |                     |      |       |      | 0.9399 [1] |
| 0                                | 120                       | 68.6 | 93                  | 71.0 | 213   | 69.6 |            |
| >0 - <5                          | 36                        | 20.6 | 22                  | 16.8 | 58    | 19.0 |            |
| 5 - 10                           | 19                        | 10.9 | 16                  | 12.2 | 35    | 11.4 |            |
| Primary site                     |                           |      |                     |      |       |      | 0.8785 [2] |
| Oropharynx NOS                   | 10                        | 5.7  | 7                   | 5.3  | 17    | 5.6  |            |
| Tonsillar fossa, tonsil          | 88                        | 50.3 | 73                  | 55.7 | 161   | 52.6 |            |
| Base of tongue                   | 75                        | 42.9 | 51                  | 38.9 | 126   | 41.2 |            |
| Pharyngeal oropharynx            | 1                         | 0.6  | 0                   | 0.0  | 1     | 0.3  |            |
| Posterior pharyngeal wall        | 1                         | 0.6  | 0                   | 0.0  | 1     | 0.3  |            |
| T stage, clinical                |                           |      |                     |      |       |      | 0.5475 [2] |
| T1                               | 67                        | 38.3 | 48                  | 36.6 | 115   | 37.6 |            |
| T2                               | 80                        | 45.7 | 67                  | 51.1 | 147   | 48.0 |            |
| T3                               | 28                        | 16.0 | 16                  | 12.2 | 44    | 14.4 |            |
| N stage, clinical                |                           |      |                     |      |       |      | 0.8581 [2] |
| N0                               | 9                         | 5.1  | 4                   | 3.1  | 13    | 4.2  |            |
| N1                               | 36                        | 20.6 | 26                  | 19.8 | 62    | 20.3 |            |
| N2a                              | 24                        | 13.7 | 19                  | 14.5 | 43    | 14.1 |            |
| N2b                              | 106                       | 60.6 | 82                  | 62.6 | 188   | 61.4 |            |
| RT planning (as stratified)      |                           |      |                     |      |       |      | 0.2683 [2] |
| Unilateral                       | 52                        | 29.7 | 47                  | 35.9 | 99    | 32.4 |            |
| Bilateral                        | 123                       | 70.3 | 84                  | 64.1 | 207   | 67.6 |            |
| RT planning (per central review) |                           |      |                     |      |       |      | 0.9618 [2] |

|                               | Did Not Consent to PET/CT |              | Consented to PET/CT |              | Total      |              | p-value   |
|-------------------------------|---------------------------|--------------|---------------------|--------------|------------|--------------|-----------|
|                               | n                         | %            | n                   | %            | n          | %            |           |
| Unilateral                    | 22                        | 12.6         | 15                  | 11.5         | 37         | 12.1         |           |
| Bilateral                     | 148                       | 84.6         | 113                 | 86.3         | 261        | 85.3         |           |
| Unknown                       | 5                         | 2.9          | 3                   | 2.3          | 8          | 2.6          |           |
| <b>Assigned Treatment Arm</b> |                           |              |                     |              |            |              |           |
| IMRT + Cisplatin              | 90                        | 51.4         | 67                  | 51.1         | 157        | 51.3         | 1.000 [2] |
| IMRT                          | 85                        | 48.6         | 64                  | 48.9         | 149        | 48.7         |           |
| <b>Total</b>                  | <b>175</b>                | <b>100.0</b> | <b>131</b>          | <b>100.0</b> | <b>306</b> | <b>100.0</b> |           |

[1] Two-sided p-value for Wilcoxon rank-sum test between consent groups

[2] Two-sided p-value for Fisher's exact test between consent groups

**Supplemental Table 2. Patient and Tumor Characteristics for Patients Eligible for PET/CT Analysis**

| Patient or Tumor Characteristic | IMRT + Cisplatin |      | IMRT |      | Total |      | p-value    |
|---------------------------------|------------------|------|------|------|-------|------|------------|
|                                 | n                | %    | n    | %    | n     | %    |            |
| Age (years)                     |                  |      |      |      |       |      | 0.5484 [1] |
| ≤ 49                            | 14               | 24.1 | 4    | 6.8  | 18    | 15.4 |            |
| 50 - 59                         | 12               | 20.7 | 23   | 39.0 | 35    | 29.9 |            |
| 60 - 69                         | 20               | 34.5 | 24   | 40.7 | 44    | 37.6 |            |
| ≥ 70                            | 12               | 20.7 | 8    | 13.6 | 20    | 17.1 |            |
| Gender                          |                  |      |      |      |       |      |            |
| Male                            | 51               | 87.9 | 51   | 86.4 | 102   | 87.2 | 1.000 [2]  |
| Female                          | 7                | 12.1 | 8    | 13.6 | 15    | 12.8 |            |
| Race                            |                  |      |      |      |       |      |            |
| American Indian/Alaska Native   | 0                | 0.0  | 1    | 1.7  | 1     | 0.9  | 0.1444 [2] |
| Black or African American       | 1                | 1.7  | 0    | 0.0  | 1     | 0.9  |            |
| White                           | 55               | 94.8 | 51   | 86.4 | 106   | 90.6 |            |
| Unknown or not reported         | 2                | 3.4  | 7    | 11.9 | 9     | 7.7  |            |
| Ethnicity                       |                  |      |      |      |       |      | 0.1627 [2] |
| Hispanic or Latino              | 0                | 0.0  | 4    | 6.8  | 4     | 3.4  |            |
| Not Hispanic or Latino          | 55               | 94.8 | 51   | 86.4 | 106   | 90.6 |            |
| Unknown                         | 3                | 5.2  | 4    | 6.8  | 7     | 6.0  |            |
| Zubrod performance status       |                  |      |      |      |       |      | 0.2369 [2] |
| 0                               | 50               | 86.2 | 45   | 76.3 | 95    | 81.2 |            |
| 1                               | 8                | 13.8 | 14   | 23.7 | 22    | 18.8 |            |

| Patient or Tumor Characteristic  | IMRT + Cisplatin |       | IMRT |       | Total |       | p-value    |
|----------------------------------|------------------|-------|------|-------|-------|-------|------------|
|                                  | n                | %     | n    | %     | n     | %     |            |
| Smoking history: pack-years      |                  |       |      |       |       |       |            |
| 0                                | 37               | 63.8  | 43   | 72.9  | 80    | 68.4  | 0.3199 [1] |
| >0 - <5                          | 12               | 20.7  | 10   | 16.9  | 22    | 18.8  |            |
| 5 - 10                           | 9                | 15.5  | 6    | 10.2  | 15    | 12.8  |            |
| Primary site                     |                  |       |      |       |       |       | 0.5765 [2] |
| Oropharynx NOS                   | 2                | 3.4   | 5    | 8.5   | 7     | 6.0   |            |
| Tonsillar fossa, tonsil          | 32               | 55.2  | 32   | 54.2  | 64    | 54.7  |            |
| Base of tongue                   | 24               | 41.4  | 22   | 37.3  | 46    | 39.3  |            |
| T stage, clinical                |                  |       |      |       |       |       | 0.3925 [2] |
| T1                               | 24               | 41.4  | 18   | 30.5  | 42    | 35.9  |            |
| T2                               | 26               | 44.8  | 34   | 57.6  | 60    | 51.3  |            |
| T3                               | 8                | 13.8  | 7    | 11.9  | 15    | 12.8  |            |
| N stage, clinical                |                  |       |      |       |       |       | 0.9122 [2] |
| N0                               | 1                | 1.7   | 2    | 3.4   | 3     | 2.6   |            |
| N1                               | 12               | 20.7  | 12   | 20.3  | 24    | 20.5  |            |
| N2a                              | 8                | 13.8  | 6    | 10.2  | 14    | 12.0  |            |
| N2b                              | 37               | 63.8  | 39   | 66.1  | 76    | 65.0  |            |
| RT planning (as stratified)      |                  |       |      |       |       |       | 0.3454 [2] |
| Unilateral                       | 25               | 43.1  | 20   | 33.9  | 45    | 38.5  |            |
| Bilateral                        | 33               | 56.9  | 39   | 66.1  | 72    | 61.5  |            |
| RT planning (per central review) |                  |       |      |       |       |       | 0.7769 [2] |
| Unilateral                       | 6                | 10.3  | 8    | 13.6  | 14    | 12.0  |            |
| Bilateral                        | 52               | 89.7  | 51   | 86.4  | 103   | 88.0  |            |
| Total                            | 58               | 100.0 | 59   | 100.0 | 117   | 100.0 |            |

[1] Two-sided p-value for Wilcoxon rank-sum test between arms

[2] Two-sided p-value for Fisher's exact test between arms

### Supplemental Table 3. PET/CT Scan Evaluations per Central Review

|                                      | IMRT + Cisplatin | IMRT        | Total        |
|--------------------------------------|------------------|-------------|--------------|
| PET primary tumor assessment         |                  |             |              |
| Definite complete metabolic response | 57 ( 98.3%)      | 56 ( 94.9%) | 113 ( 96.6%) |

|                                      | IMRT + Cisplatin | IMRT        | Total        |
|--------------------------------------|------------------|-------------|--------------|
| Likely complete metabolic response   | 1 ( 1.7%)        | 0 ( 0.0%)   | 1 ( 0.9%)    |
| Likely inflammatory                  | 0 ( 0.0%)        | 2 ( 3.4%)   | 2 ( 1.7%)    |
| Definite residual metabolic disease  | 0 ( 0.0%)        | 1 ( 1.7%)   | 1 ( 0.9%)    |
| PET right neck assessment            |                  |             |              |
| Definite complete metabolic response | 55 ( 94.8%)      | 57 ( 96.6%) | 112 ( 95.7%) |
| Likely complete metabolic response   | 3 ( 5.2%)        | 2 ( 3.4%)   | 5 ( 4.3%)    |
| PET left neck assessment             |                  |             |              |
| Definite complete metabolic response | 56 ( 96.6%)      | 54 ( 91.5%) | 110 ( 94.0%) |
| Likely complete metabolic response   | 2 ( 3.4%)        | 2 ( 3.4%)   | 4 ( 3.4%)    |
| Likely inflammatory                  | 0 ( 0.0%)        | 1 ( 1.7%)   | 1 ( 0.9%)    |
| Likely residual metabolic disease    | 0 ( 0.0%)        | 2 ( 3.4%)   | 2 ( 1.7%)    |
| PET overall interpretation           |                  |             |              |
| Negative for residual tumor          | 58 (100.0%)      | 57 ( 96.6%) | 115 ( 98.3%) |
| Positive for residual tumor          | 0 ( 0.0%)        | 2 ( 3.4%)   | 2 ( 1.7%)    |

**Supplemental Figure 2**  
**Progression-Free Survival by PET/CT Consent**

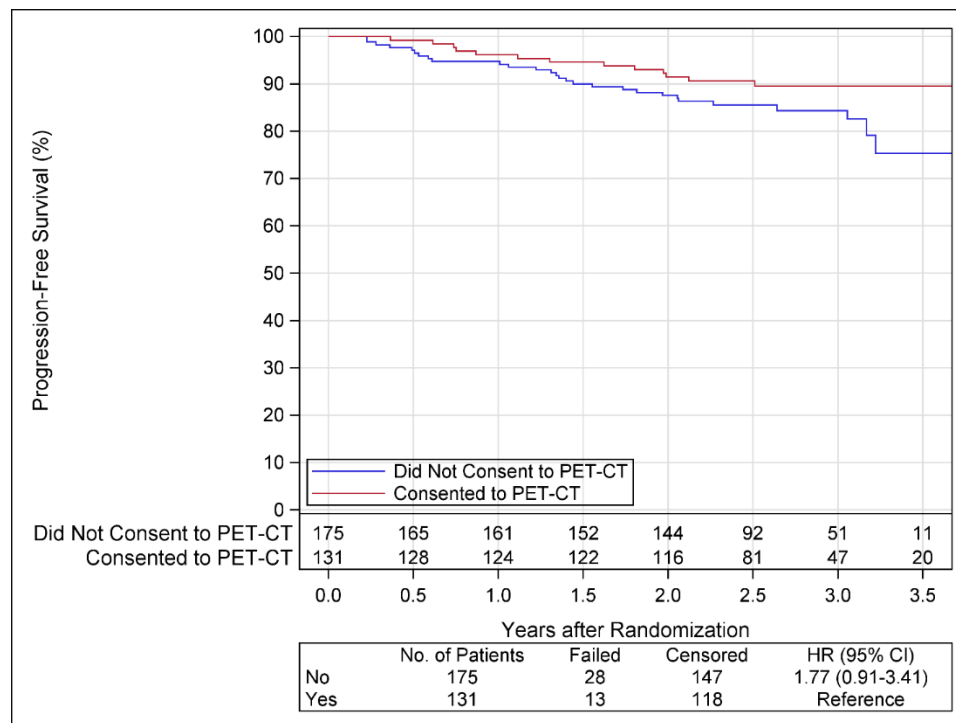

**Supplemental Figure 3**  
**Local-Regional Failure by PET/CT Consent**

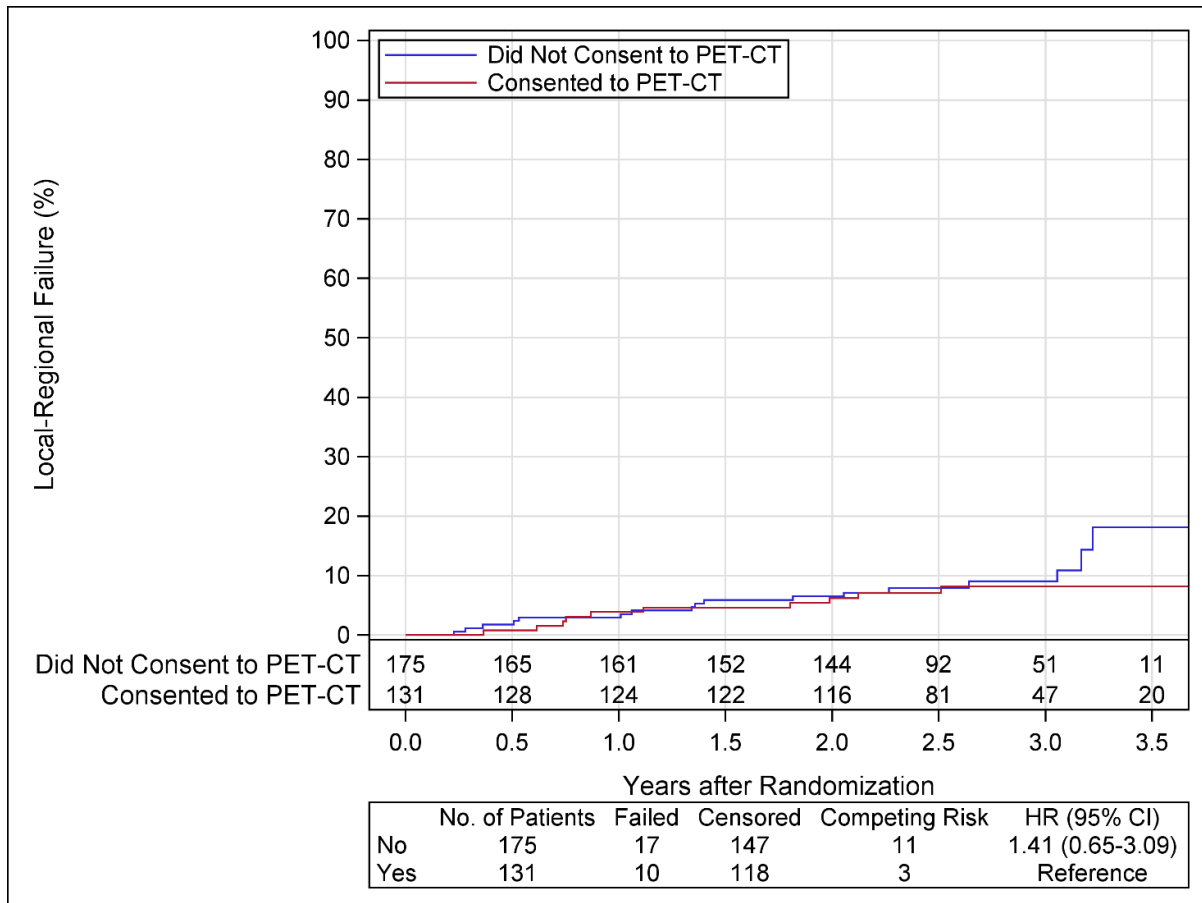

**Supplemental Table 4. Sensitivity Analysis: Negative Predictive Value per Central Review for Two-Year Progression-Free Survival**

|                                                | IMRT + Cisplatin | IMRT        | Total        |
|------------------------------------------------|------------------|-------------|--------------|
| <b>PET overall interpretation</b>              |                  |             |              |
| Positive for residual tumor                    | 0 ( 0.0%)        | 2 ( 3.8%)   | 2 ( 1.9%)    |
| Negative for residual tumor                    | 51 (100.0%)      | 51 ( 96.2%) | 102 ( 98.1%) |
| <b>2-year progression-free survival status</b> |                  |             |              |
| Failure                                        | 3 ( 5.9%)        | 5 ( 9.8%)   | 8 ( 7.8%)    |
| Non-failure                                    | 48 ( 94.1%)      | 46 ( 90.2%) | 94 ( 92.2%)  |

|                                    | IMRT + Cisplatin | IMRT         | Total        |
|------------------------------------|------------------|--------------|--------------|
| NPV of 2-yr PFS                    | 94.1%            | 90.2%        | 92.2%        |
| (95% exact CI)                     | (83.8-98.8%)     | (78.6-96.7%) | (85.1-96.6%) |
| (One-sided 90% exact LCB)          | (87.4%)          | (82.6%)      | (87.6%)      |
| H0: NPV $\leq$ 90% vs HA: NPV >90% |                  |              |              |
| p-value (exact)                    |                  |              | 0.2982       |

CI, confidence interval; LCB, lower confidence bound

Note: Sensitivity analysis only includes scans within 10-16 weeks post end of RT

### Supplemental Table 5. Sensitivity Analysis: Negative Predictive Value per Central Review for Two-Year Locoregional Control

|                                      | IMRT + Cisplatin | IMRT         | Total        |
|--------------------------------------|------------------|--------------|--------------|
| PET overall interpretation           |                  |              |              |
| Positive for residual tumor          | 0 ( 0.0%)        | 2 ( 3.9%)    | 2 ( 2.0%)    |
| Negative for residual tumor          | 50 (100.0%)      | 49 ( 96.1%)  | 99 ( 98.0%)  |
| 2-year local-regional control status |                  |              |              |
| Failure                              | 2 ( 4.0%)        | 3 ( 6.1%)    | 5 ( 5.1%)    |
| Non-failure                          | 48 ( 96.0%)      | 46 ( 93.9%)  | 94 ( 94.9%)  |
| NPV of 2-yr LRC                      | 96.0%            | 93.9%        | 94.9%        |
| (95% exact CI)                       | (86.3-99.5%)     | (83.1-98.7%) | (88.6-98.3%) |
| (One-sided 90% exact LCB)            | (89.7%)          | (86.9%)      | (90.8%)      |
| H0: NPV $\leq$ 90% vs HA: NPV >90%   |                  |              |              |
| p-value (exact)                      |                  |              | 0.0612       |

CI, confidence interval; LCB, lower confidence bound

Note: Sensitivity analysis only includes scans within 10-16 weeks post end of RT

### Supplemental Table 6. Negative Predictive Value per Local Review for Two-Year Progression-Free Survival

|                             | IMRT + Cisplatin | IMRT      | Total     |
|-----------------------------|------------------|-----------|-----------|
| Primary Analysis            |                  |           |           |
| PET overall interpretation  |                  |           |           |
| Positive for residual tumor | 3 ( 6.3%)        | 3 ( 5.9%) | 6 ( 6.1%) |

|                                         | IMRT + Cisplatin | IMRT         | Total        |
|-----------------------------------------|------------------|--------------|--------------|
| Indeterminate                           | 3 ( 6.3%)        | 5 ( 9.8%)    | 8 ( 8.1%)    |
| Negative for residual tumor             | 42 ( 87.5%)      | 43 ( 84.3%)  | 85 ( 85.9%)  |
| 2-year progression-free survival status |                  |              |              |
| Failure                                 | 3 ( 7.1%)        | 4 ( 9.3%)    | 7 ( 8.2%)    |
| Non-failure                             | 39 ( 92.9%)      | 39 ( 90.7%)  | 78 ( 91.8%)  |
| NPV of 2-yr PFS                         | 92.9%            | 90.7%        | 91.8%        |
| (95% exact CI)                          | (80.5-98.5%)     | (77.9-97.4%) | (83.8-96.6%) |
| (One-sided 90% exact LCB)               | (84.8%)          | (82.3%)      | (86.5%)      |
| H0: NPV ≤90% vs HA: NPV >90%            |                  |              |              |
| p-value (exact)                         |                  |              | 0.3753       |
| <b>Sensitivity Analysis</b>             |                  |              |              |
| PET overall interpretation              |                  |              |              |
| Positive for residual tumor             | 3 ( 7.0%)        | 3 ( 6.5%)    | 6 ( 6.7%)    |
| Indeterminate                           | 2 ( 4.7%)        | 5 ( 10.9%)   | 7 ( 7.9%)    |
| Negative for residual tumor             | 38 ( 88.4%)      | 38 ( 82.6%)  | 76 ( 85.4%)  |
| 2-year progression-free survival status |                  |              |              |
| Failure                                 | 2 ( 5.3%)        | 4 ( 10.5%)   | 6 ( 7.9%)    |
| Non-failure                             | 36 ( 94.7%)      | 34 ( 89.5%)  | 70 ( 92.1%)  |
| NPV of 2-yr PFS                         | 94.7%            | 89.5%        | 92.1%        |
| (95% exact CI)                          | (82.3-99.4%)     | (75.2-97.1%) | (83.6-97.0%) |
| (One-sided 90% exact LCB)               | (86.6%)          | (80.1%)      | (86.6%)      |
| H0: NPV ≤90% vs HA: NPV >90%            |                  |              |              |
| p-value (exact)                         |                  |              | 0.3533       |

CI, confidence interval; LCB, lower confidence bound

Note: Sensitivity analysis only includes scans within 10-16 weeks post end of RT

**Supplemental Table 7.**  
**Negative Predictive Value per Local Review for Two-Year Locoregional Control**



|                      |                                                       | IMRT + Cisplatin      | IMRT                  | Total                 |
|----------------------|-------------------------------------------------------|-----------------------|-----------------------|-----------------------|
| Primary Analysis     | PET overall interpretation                            |                       |                       |                       |
|                      | Positive for residual tumor                           | 3 ( 6.4%)             | 3 ( 6.1%)             | 6 ( 6.3%)             |
|                      | Indeterminate                                         | 3 ( 6.4%)             | 5 ( 10.2%)            | 8 ( 8.3%)             |
|                      | Negative for residual tumor                           | 41 ( 87.2%)           | 41 ( 83.7%)           | 82 ( 85.4%)           |
|                      | 2-year local-regional control status                  |                       |                       |                       |
|                      | Failure                                               | 2 ( 4.9%)             | 2 ( 4.9%)             | 4 ( 4.9%)             |
|                      | Non-failure                                           | 39 ( 95.1%)           | 39 ( 95.1%)           | 78 ( 95.1%)           |
|                      | NPV of 2-yr LRC (95% exact CI)                        | 95.1%<br>(83.5-99.4%) | 95.1%<br>(83.5-99.4%) | 95.1%<br>(88.0-98.7%) |
|                      | (One-sided 90% exact LCB)                             | (87.5%)               | (87.5%)               | (90.5%)               |
|                      | H0: NPV $\leq$ 90% vs HA: NPV >90%<br>p-value (exact) |                       |                       | 0.0777                |
| Sensitivity Analysis | PET overall interpretation                            |                       |                       |                       |
|                      | Positive for residual tumor                           | 3 ( 7.1%)             | 3 ( 6.8%)             | 6 ( 7.0%)             |
|                      | Indeterminate                                         | 2 ( 4.8%)             | 5 ( 11.4%)            | 7 ( 8.1%)             |
|                      | Negative for residual tumor                           | 37 ( 88.1%)           | 36 ( 81.8%)           | 73 ( 84.9%)           |
|                      | 2-year local-regional control status                  |                       |                       |                       |
|                      | Failure                                               | 1 ( 2.7%)             | 2 ( 5.6%)             | 3 ( 4.1%)             |
|                      | Non-failure                                           | 36 ( 97.3%)           | 34 ( 94.4%)           | 70 ( 95.9%)           |
|                      | NPV of 2-yr LRC (95% exact CI)                        | 97.3%<br>(85.8-99.9%) | 94.4%<br>(81.3-99.3%) | 95.9%<br>(88.5-99.1%) |
|                      | (One-sided 90% exact LCB)                             | (89.9%)               | (85.9%)               | (91.1%)               |
|                      | H0: NPV $\leq$ 90% vs HA: NPV >90%<br>p-value (exact) |                       |                       | 0.0580                |

CI, confidence interval; LCB, lower confidence bound

Note: Sensitivity analysis only includes scans within 10-16 weeks post end of RT

**Supplemental Table 8.1**  
**Neck Site PET/CT Score Agreement Between Local and Central Reviews**

| Local Review         |                                      | Central Review                       |                                    |                     |                                   |                                     |
|----------------------|--------------------------------------|--------------------------------------|------------------------------------|---------------------|-----------------------------------|-------------------------------------|
|                      |                                      | Definite complete metabolic response | Likely complete metabolic response | Likely inflammatory | Likely residual metabolic disease | Definite residual metabolic disease |
| Primary Site (N=100) | Definite complete metabolic response | 70 (72.9%)                           | 1 (100.0%)                         | 1 (50.0%)           | 0 (0.0%)                          | 0 (0.0%)                            |
|                      | Likely complete metabolic response   | 13 (13.5%)                           | 0 (0.0%)                           | 1 (50.0%)           | 0 (0.0%)                          | 0 (0.0%)                            |
|                      | Likely inflammatory                  | 10 (10.4%)                           | 0 (0.0%)                           | 0 (0.0%)            | 0 (0.0%)                          | 1 (100.0%)                          |
|                      | Likely residual metabolic disease    | 2 (2.1%)                             | 0 (0.0%)                           | 0 (0.0%)            | 0 (0.0%)                          | 0 (0.0%)                            |
|                      | Definite residual metabolic disease  | 1 (1.0%)                             | 0 (0.0%)                           | 0 (0.0%)            | 0 (0.0%)                          | 0 (0.0%)                            |
| Right Neck (N=91)    | Definite complete metabolic response | 75 (85.2%)                           | 0 (0.0%)                           | 0 (0.0%)            | 0 (0.0%)                          | 0 (0.0%)                            |
|                      | Likely complete metabolic response   | 6 (6.8%)                             | 2 (66.7%)                          | 0 (0.0%)            | 0 (0.0%)                          | 0 (0.0%)                            |
|                      | Likely inflammatory                  | 3 (3.4%)                             | 0 (0.0%)                           | 0 (0.0%)            | 0 (0.0%)                          | 0 (0.0%)                            |
|                      | Likely residual metabolic disease    | 3 (3.4%)                             | 1 (33.3%)                          | 0 (0.0%)            | 0 (0.0%)                          | 0 (0.0%)                            |
|                      | Definite residual metabolic disease  | 1 (1.1%)                             | 0 (0.0%)                           | 0 (0.0%)            | 0 (0.0%)                          | 0 (0.0%)                            |
| Left Neck (N=89)     | Definite complete metabolic response | 70 (83.3%)                           | 3 (100.0%)                         | 0 (0.0%)            | 1 (50.0%)                         | 0 (0.0%)                            |
|                      | Likely complete metabolic response   | 10 (11.9%)                           | 0 (0.0%)                           | 0 (0.0%)            | 0 (0.0%)                          | 0 (0.0%)                            |
|                      | Likely inflammatory                  | 4 (4.8%)                             | 0 (0.0%)                           | 0 (0.0%)            | 0 (0.0%)                          | 0 (0.0%)                            |
|                      | Likely residual metabolic disease    | 0 (0.0%)                             | 0 (0.0%)                           | 0 (0.0%)            | 0 (0.0%)                          | 0 (0.0%)                            |
|                      | Definite residual metabolic disease  | 0 (0.0%)                             | 0 (0.0%)                           | 0 (0.0%)            | 1 (50.0%)                         | 0 (0.0%)                            |

**Supplemental Table 8.2**  
**Overall PET/CT Score Agreement Between Local and Central Reviews**

|                 |                             | Central Review              |                             |               |
|-----------------|-----------------------------|-----------------------------|-----------------------------|---------------|
|                 |                             | Negative for residual tumor | Positive for residual tumor | Indeterminate |
| Local Review    |                             |                             |                             |               |
| Overall (N=100) | Negative for residual tumor | 86 (87.8%)                  | 0 (0.0%)                    | 0 (0.0%)      |
|                 | Positive for residual tumor | 5 (5.1%)                    | 1 (50.0%)                   | 0 (0.0%)      |
|                 | Indeterminate               | 7 (7.1%)                    | 1 (50.0%)                   | 0 (0.0%)      |

**Supplemental Table 8.3**  
**Measure of Agreement (95% CI) Between Local and Central Reviews**

|                            | Overall           | Primary Site*     | Right Neck*       | Left Neck*        |
|----------------------------|-------------------|-------------------|-------------------|-------------------|
| Gwet's AC1/AC2 (95% CI)    | 0.86 (0.78, 0.94) | 0.84 (0.78, 0.91) | 0.91 (0.86, 0.97) | 0.92 (0.87, 0.96) |
| Brennan-Prediger (95% CI)  | 0.80 (0.70, 0.91) | 0.69 (0.59, 0.8)  | 0.81 (0.71, 0.92) | 0.82 (0.75, 0.90) |
| Percent Agreement (95% CI) | 0.87 (0.80, 0.94) | 0.88 (0.84, 0.92) | 0.93 (0.88, 0.97) | 0.93 (0.90, 0.96) |

\*Weighted Coefficients (linear weights)
